# Supplementary material for: Aminophenol–formaldehyde particles containing hydrophilic benzenoid-amine for a highly efficient solar-thermal water harvester
Source: Royal Society of Chemistry journal article supplement (doi:10.1039/d4ta06763k), 2024-12-17
Supplement: d4ta06763k1.pdf [file d4ta06763k1.pdf]

## Supplementary Information

# Aminophenol-formaldehyde particles containing hydrophilic benzenoid-amine for highly efficient solar-thermal water harvester

Rongtai Yu<sup>a,b,\*</sup>, Jianchao Xie<sup>a</sup>, Fangfen Jin<sup>a</sup>, Weiwei Lu<sup>a</sup>, Mingzhu Jin<sup>a</sup>, Xinyang He<sup>a</sup>,  
Ashok K. Nanjundan,<sup>b,c</sup> Chengzhong Yu<sup>b,\*</sup> and Xiaodan Huang<sup>b,\*</sup>

<sup>a</sup> *School of Materials Science and Engineering, Jingdezhen Ceramic University,  
Jingdezhen, Jiangxi 333403, P. R. China*

<sup>b</sup> *Australian Institute for Bioengineering and Nanotechnology, The University of  
Queensland, Brisbane, Queensland 4072, Australia.*

<sup>c</sup> *School of Engineering, University of Southern Queensland, Springfield, QLD 4300,  
Australia.*

\* Corresponding authors, E-mail address: yurongtai@jci.edu.cn (R. Yu),  
c.yu@uq.edu.au (C. Yu), x.huang@uq.edu.au (X. Huang)

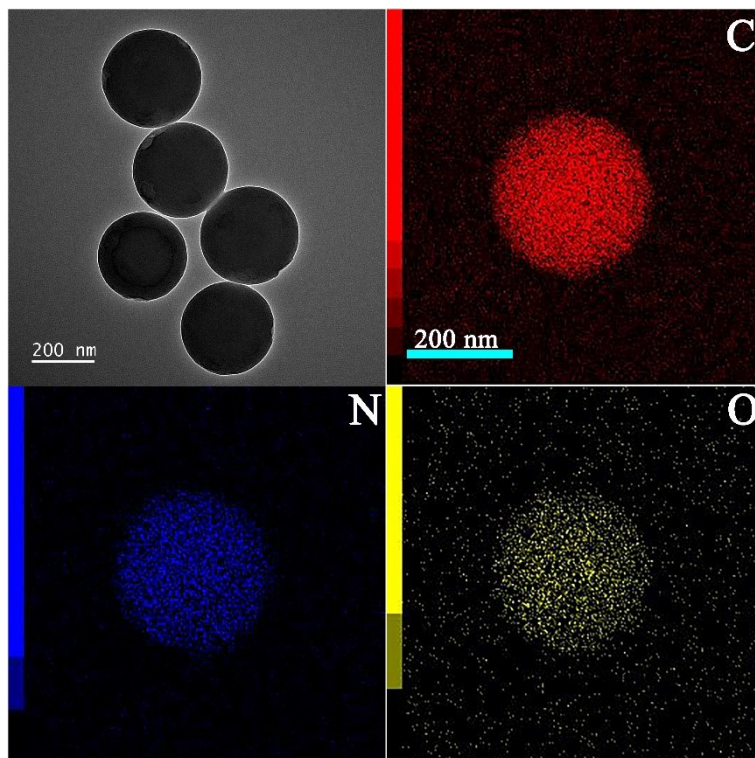

**Fig. S1** TEM image and elemental mapping of the carbonized APF particles.

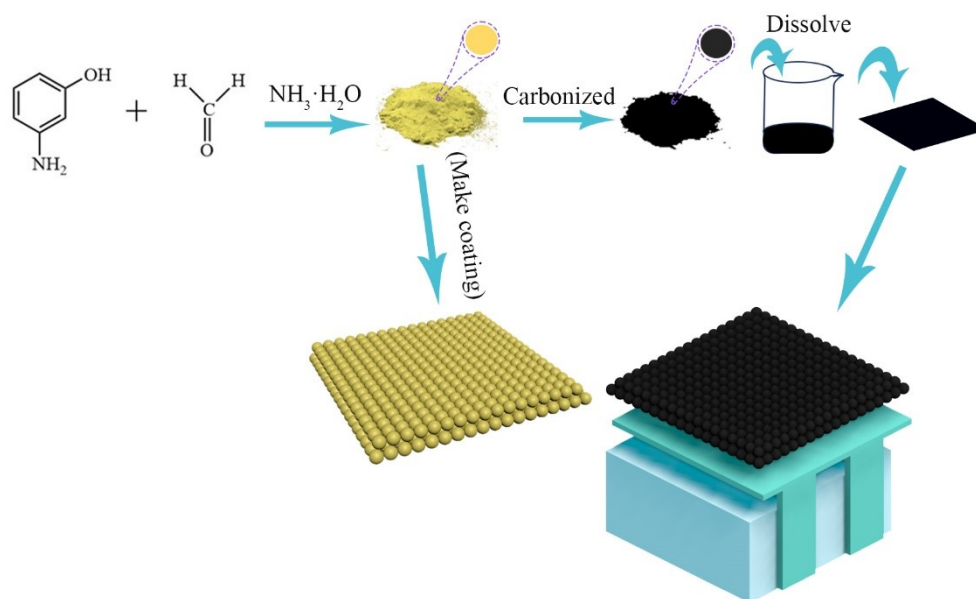

**Fig. S2** The schematic diagram of the preparation process of the interface evaporator.

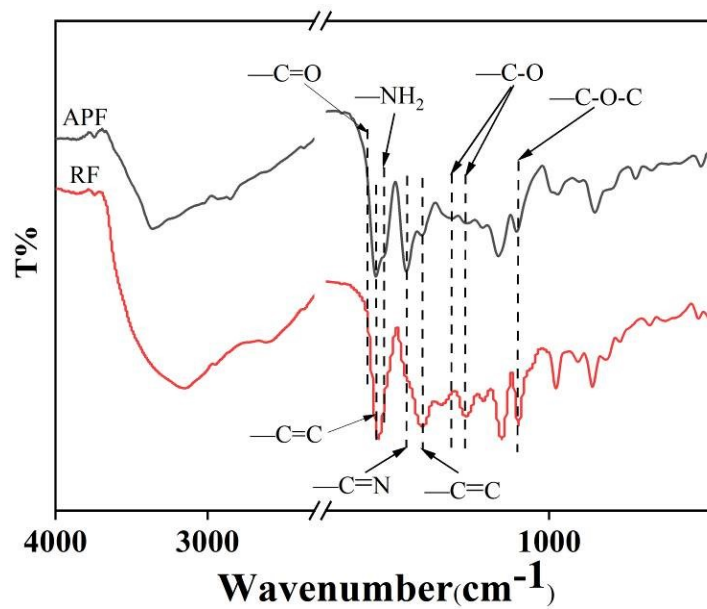

**Fig. S3** FTIR spectra for APF and RF

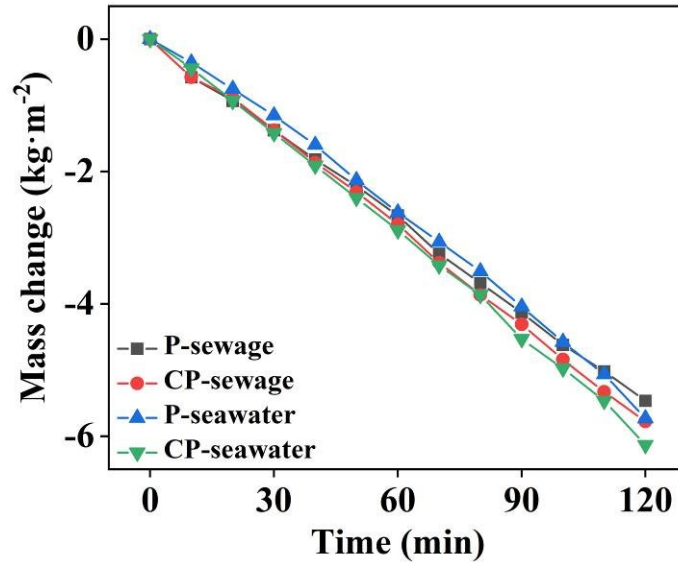

**Fig. S4** The mass change of aminophenol-formaldehyde resins water evaporation performance under natural solar irradiance with functional time.

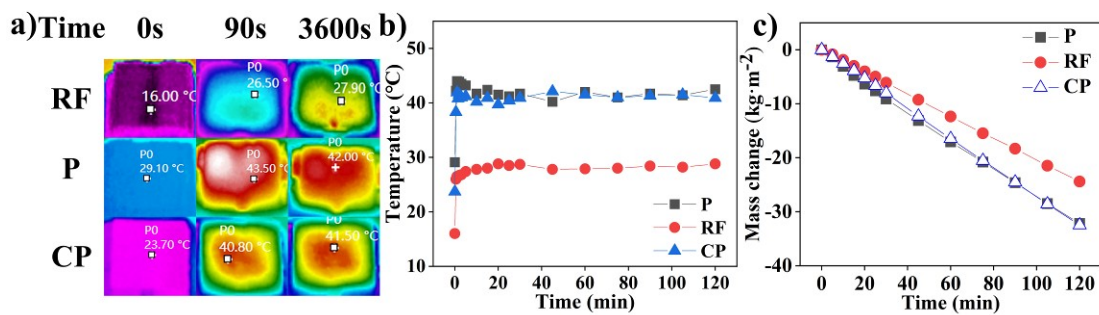

**Fig. S5** The effect of hydrophilic benzenoid-amine on evaporation performance under a solar simulator. a) IR thermal images of the devices. b-c) Evaporation surface temperature and mass change as a functional time.

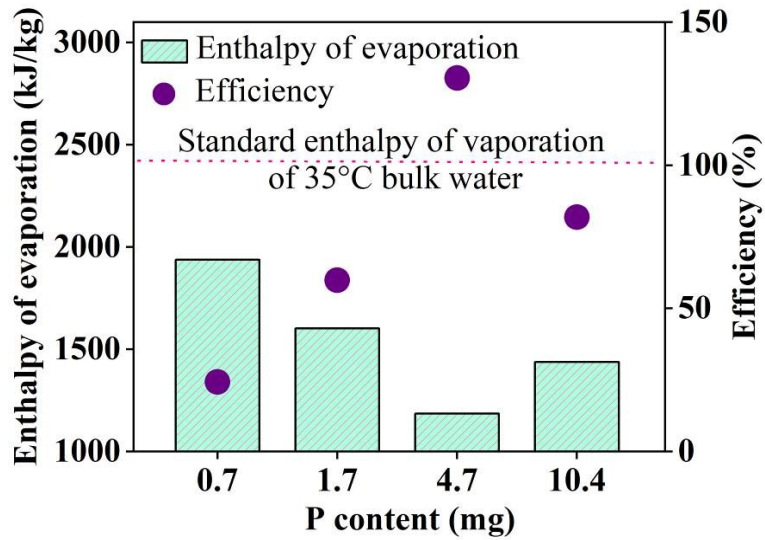

**Fig. S6** The effect of the amount of polymer on the coating on evaporation enthalpy and evaporation rate under a solar simulator.

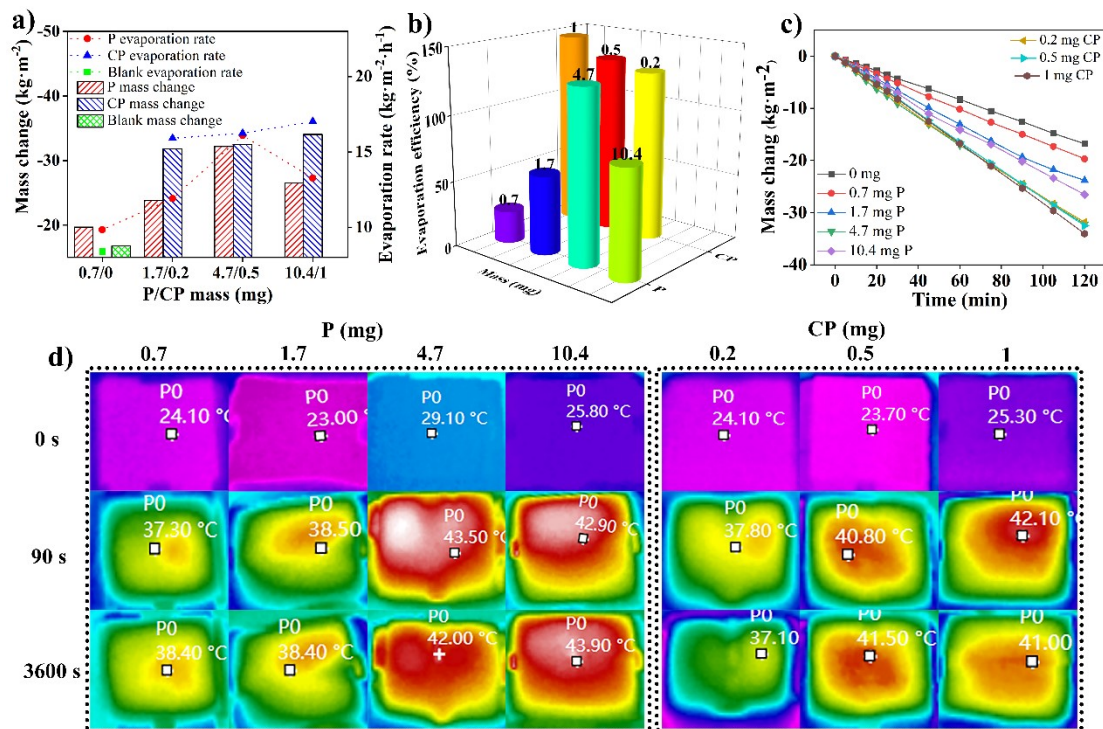

**Fig. S7** APF water evaporation performance under a solar simulator ( $3.9 \text{ kW m}^{-2}$ , 15 A).

a) The evaporation rates and mass change of water, b) evaporation efficiency, c) water mass change and d) IR images of evaporation surfaces during evaporation.

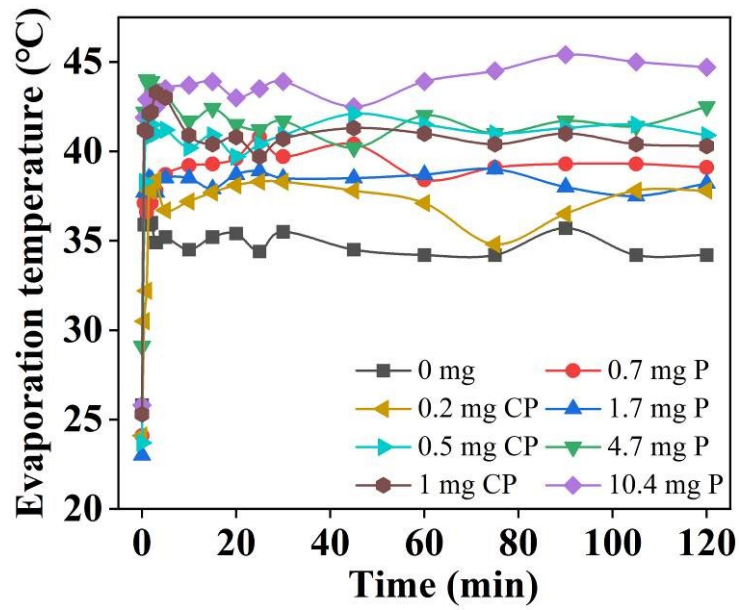

**Fig. S8** Evaporation surface temperature of the APF-based evaporator with different P/CP weight.

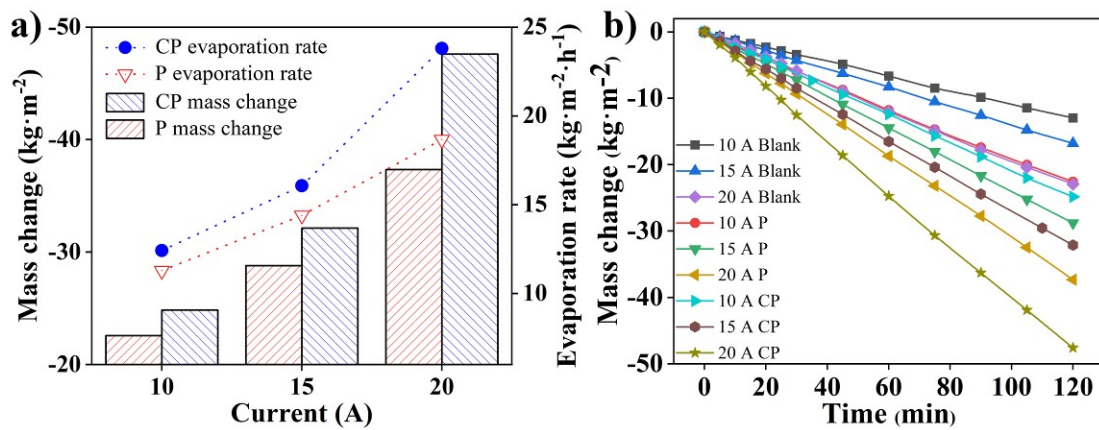

**Fig. S9** The effect of light intensity on APF-based evaporator solar-to-vapor conversion performance in deionized water. a) Mass change and evaporation rate, b) water change as functional time.



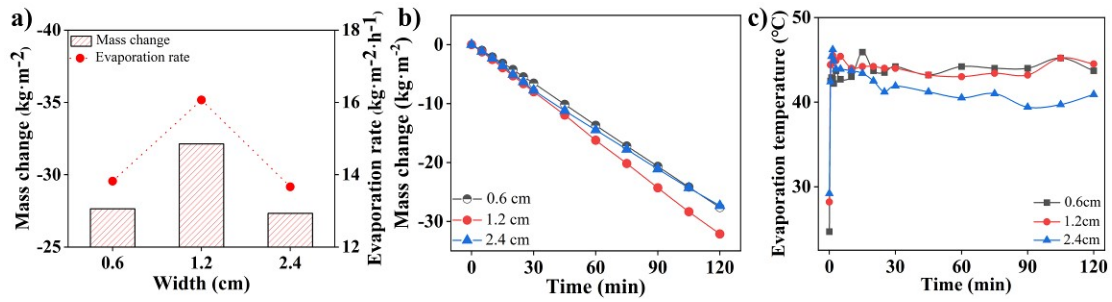

**Fig. S10** The amount of water delivery on APF-based evaporator photothermal conversion performance (15 A). a) Mass change and evaporation rate. b) Mass change as functional time. c) Evaporation surface temperature as functional time.

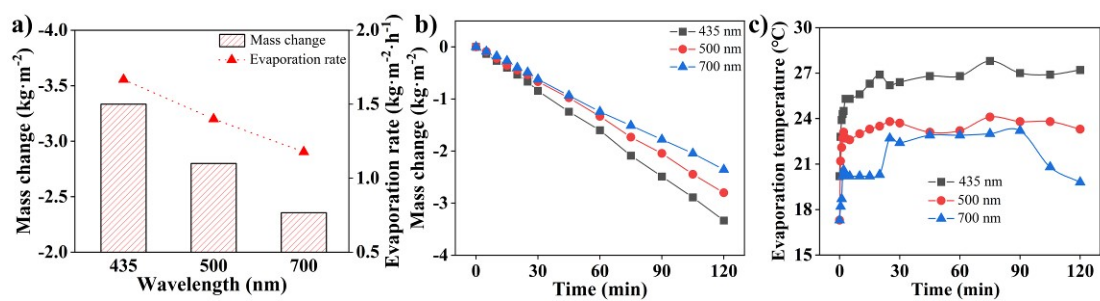

**Fig. S11** The effect of monochromatic light on the photothermal conversion performance of APF-based evaporator. a) Mass change and evaporation rate. b) Mass change as functional time. c) Evaporation surface temperature as functional time.

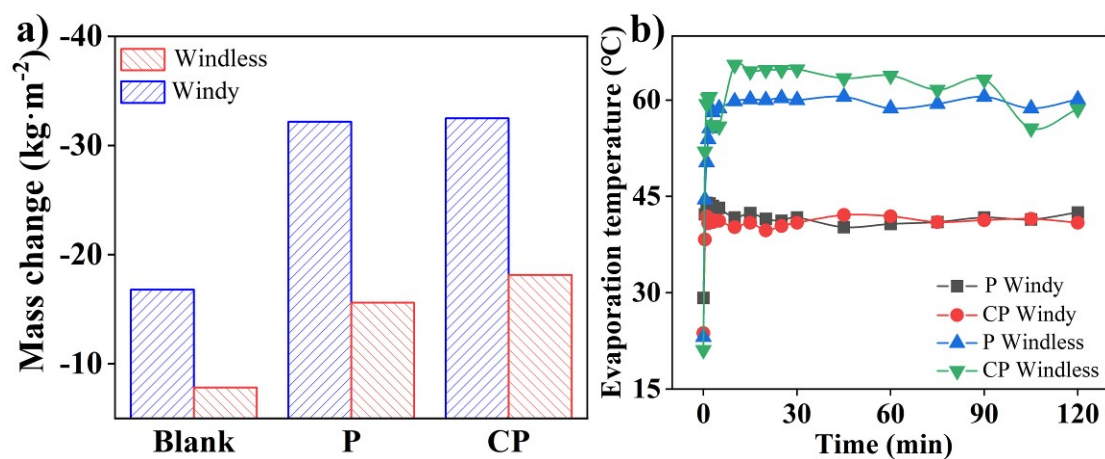

**Fig. S12** The influence of wind at the exit of xenon lamp on APF-based evaporator photothermal conversion performance. a) Mass change and evaporation rate. b) Evaporation surface temperature as functional time.

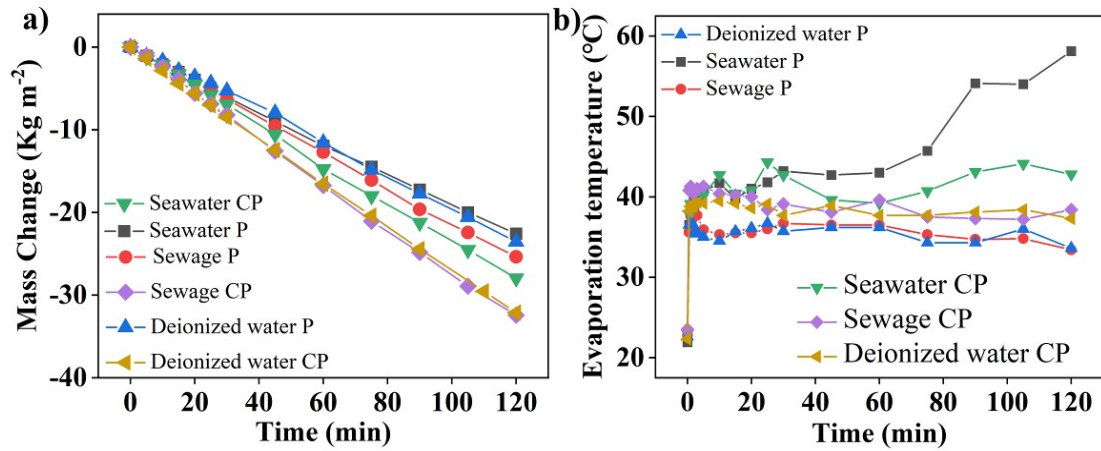

**Fig. S13** Evaporation performance of APF-based evaporators in sewage, simulated seawater, and deionized water under laboratory test ( $3.9 \text{ kW m}^{-2}$ ). a) Mass change. b) Evaporation surface temperature.

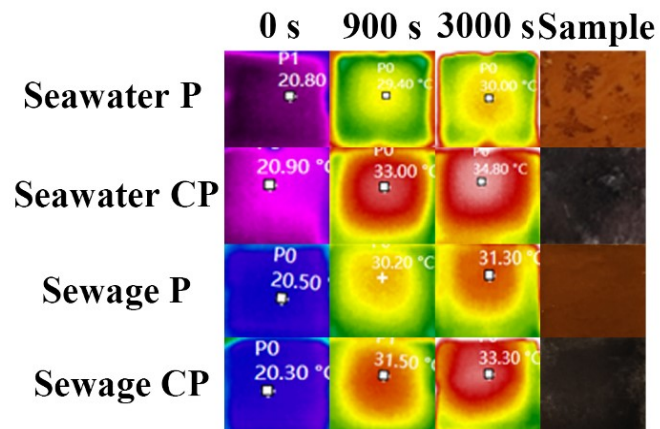

**Fig. S14** IR images of the APF-based evaporator and the picture of the coating after the experiment.



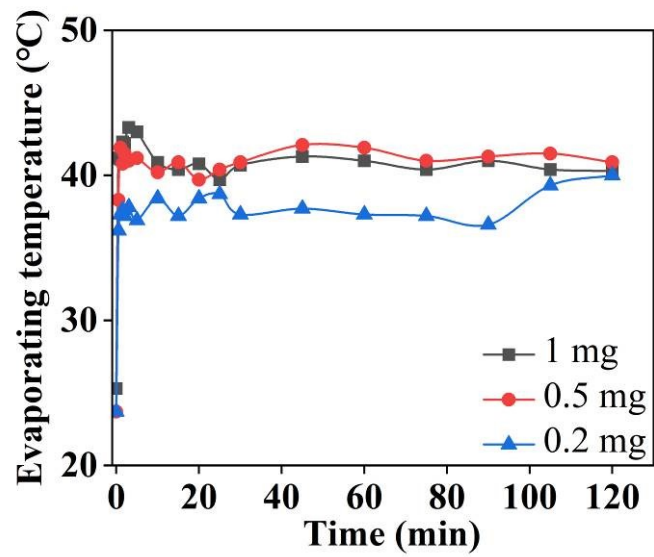

**Fig. S15** Evaporation surface temperature of APF-based evaporator with different CP weight.

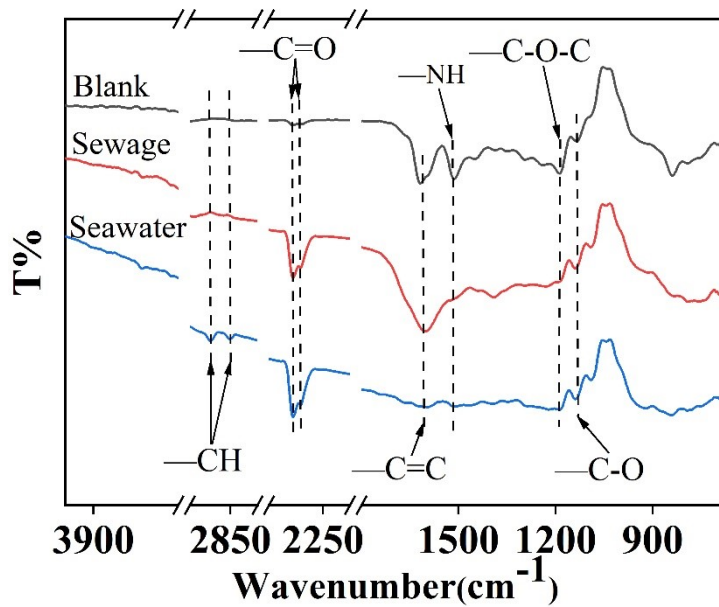

**Fig. S16** FTIR of the carbonized APF-based evaporator after practical wastewater harvesting under laboratory test (3.9 kW m<sup>-2</sup>).

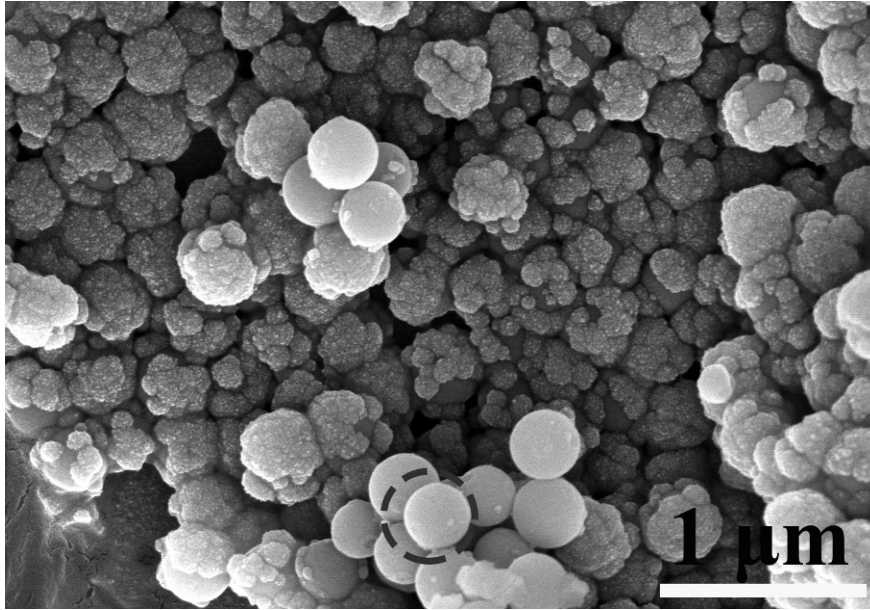

**Fig. S17** The SEM image of carbonized APF-based evaporator after evaporation of sewage under laboratory test ( $3.9 \text{ kW m}^{-2}$ ).

**Table S1** The element content analysis of the APF-based evaporator after evaporation of simulated seawater.

| Element | Atomic | Conc, (wt.%) | Element | Atomic | Conc, (wt.%) |
|---------|--------|--------------|---------|--------|--------------|
| Mg      | 0.532  | 0.983        | C       | 79.653 | 72.653       |
| Ca      | 0.358  | 1.089        | N       | 1.076  | 1.145        |
| Na      | 1.069  | 1.866        | O       | 16.480 | 20.024       |
| Cl      | 0.832  | 2.240        |         |        |              |

**Table S2** The element content analysis of the carbonized polymer after evaporation of sewage.

| The point of Fig S14 |        |              | The point of Fig.5 f |        |              |
|----------------------|--------|--------------|----------------------|--------|--------------|
| Element              | Atomic | Conc, (wt.%) | Element              | Atomic | Conc, (wt.%) |
| C                    | 71.900 | 66.652       | C                    | 75.935 | 68.266       |
| N                    | 10.931 | 11.817       | N                    | 0.000  | 0.000        |
| O                    | 16.817 | 20.767       | O                    | 20.842 | 24.959       |
| Si                   | 0.352  | 0.763        | Si                   | 3.223  | 6.775        |
